# Supplementary material
Source: MDPI journal article supplement (https://www.mdpi.com/2304-6740/11/8/319)
Supplement: s1 [file s1]

## Supplementary Information to the article

### ***Tailoring of Hydrogen Generation by Hydrolysis of Magnesium Hydride in Organic Acids Solutions and Development of Generator of the Pressurised H<sub>2</sub> Based on this Process***

by M.V. Lototsky, M.W. Davids, T.K. Sekgobela, A.A. Arbuzov, S.A. Mozhzhukhin, Yongyang Zhu, Renheng Tang, B.P. Tarasov

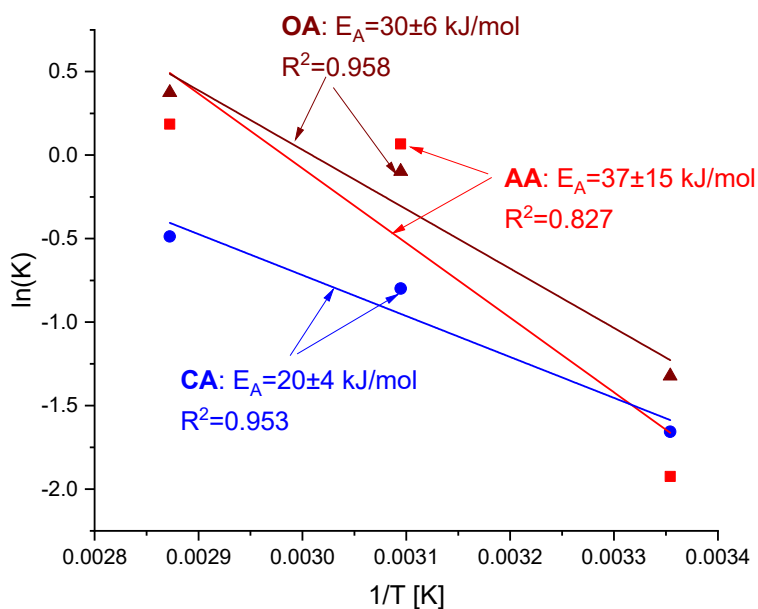

Figure S1. Arrhenius plots for hydrogen generation by hydrolysis of  $MgH_2$  in 1 wt.% aqueous solutions of acetic (AA), citric (CA) and oxalic (OA) acids
